# Supplementary material for: Can sea urchins beat the heat? Sea urchins, thermal tolerance and climate change
Source: PeerJ. 2015 Jun 9;3:e1006. doi: 10.7717/peerj.1006 (PMC4465948; doi:10.7717/peerj.1006)
Supplement: Supplemental Information 4 — Righting times of all sea urchins from all seasons at experimental temperatures below TLoR. [file peerj-03-1006-s004.xlsx]

## Sheet: Sheet1
SPECIES	TEST TEMP.	SEASON	RIGHTING TIME	INDIVIDUAL
D	21.9	SP	45	D4
D	22	SP	25	D4
D	22	SP	69	D4
D	30.3	SP	18	D4
D	30.2	SP	35	D4
D	29.9	SP	32	D4
E	23.1	SP	261	E1
E	23.3	SP	57	E2
E	23	SP	283	E1
E	23.1	SP	77	E2
E	22.9	SP	150	E2
E	25.4	SP	217	E1
E	25.4	SP	69	E2
E	25.1	SP	336	E1
E	24.8	SP	563	E1
E	25	SP	56	E2
E	28.2	SP	254	E1
E	28.4	SP	50	E2
E	28.1	SP	155	E1
E	28.1	SP	138	E2
E	27.9	SP	239	E1
E	28.1	SP	45	E2
E	29.9	SP	620	E1
D	23.3	SP	57	D5
D	23.7	SP	20	D5
D	23.7	SP	39	D5
D	25.6	SP	37	D5
D	25.7	SP	23	D5
D	25.5	SP	34	D5
D	28.6	SP	33	D5
D	28.4	SP	55	D5
D	29.2	SP	48	D5
E	24.1	SP	66	E3
E	24	SP	89	E3
E	23.9	SP	93	E3
E	25.6	SP	114	E3
E	25.5	SP	106	E3
E	25.6	SP	102	E3
E	28.9	SP	214	E3
E	28.4	SP	169	E3
E	28.8	SP	329	E3
D	23.8	SP	18	D6
D	25.5	SP	46	D6
D	25.5	SP	38	D6
D	25.4	SP	30	D6
D	28.8	SP	19	D6
D	28.7	SP	16	D6
D	28.5	SP	19	D6
E	23.4	SP	152	E4
E	25.9	SP	195	E4
E	25.8	SP	135	E4
E	28.1	SP	210	E4
E	28.5	SP	60	E4
E	30.7	SP	123	E1
E	30.9	SP	65	E2
E	30.4	SP	166	E2
E	30.5	SP	60	E4
E	30.3	SP	90	E4
E	23.2	SP	139	E5
E	23.2	SP	138	E5
E	25.9	SP	92	E5
E	25.8	SP	55	E5
E	28.5	SP	60	E5
E	28.2	SP	69	E5
E	30.5	SP	46	E5
E	30.3	SP	285	E5
E	23	SP	107	E6
E	23	SP	284	E6
E	23	SP	103	E6
E	25.6	SP	55	E6
E	25.5	SP	59	E6
E	25.3	SP	87	E6
E	28.2	SP	227	E6
E	27.4	SP	47	E6
E	29.5	SP	588	E6
E	29.1	SP	97	E6
E	28.7	SP	169	E6
E	29.7	SP	180	E6
E	30	SP	1095	E6
E	23	SP	142	E7
E	23	SP	157	E7
E	23	SP	172	E7
E	25.5	SP	143	E7
E	25.5	SP	115	E7
E	25.3	SP	103	E7
E	28.2	SP	68	E7
E	29.1	SP	66	E7
E	28.7	SP	69	E7
E	29	SP	600	E7
E	30.5	SP	304	E7
D	23.9	SP	15	D7
D	23.8	SP	43	D7
D	23.8	SP	16	D7
D	25.6	SP	32	D7
D	25.5	SP	20	D7
D	25.3	SP	43	D7
D	27.9	SP	18	D7
D	28	SP	19	D7
D	30.3	SP	19	D7
D	30.1	SP	9	D7
D	24.4	SP	45	D8
D	24.4	SP	28	D8
D	24.4	SP	69	D8
D	25.6	SP	43	D8
D	25.4	SP	89	D8
D	25.4	SP	65	D8
D	27.5	SP	51	D8
D	27.5	SP	19	D8
D	27.5	SP	42	D8
D	29.2	SP	26	D8
D	29	SP	122	D8
D	29	SP	38	D8
D	30.8	SP	182	D8
D	22.9	SP	43	D9
D	22.9	SP	66	D9
D	22.9	SP	47	D9
D	25.3	SP	27	D9
D	25.3	SP	39	D9
D	25.2	SP	30	D9
D	27	SP	30	D9
D	26.8	SP	96	D9
D	28.7	SP	102	D9
D	28.6	SP	51	D9
D	29.9	SP	30	D9
D	29.6	SP	101	D9
D	30.3	SP	76	D9
D	30.3	SP	35	D9
D	30.2	SP	42	D9
E	22.9	SP	51	E9
E	22.9	SP	61	E9
E	25.4	SP	80	E9
E	25	SP	121	E9
E	27.5	SP	37	E9
E	27.3	SP	140	E9
E	29.1	SP	34	E9
E	28.6	SP	127	E9
E	30.3	SP	292	E9
D	22.9	SP	42	D10
D	22.9	SP	26	D10
D	24.7	SP	27	D10
D	24.7	SP	42	D10
D	25.9	SP	31	D10
D	25.6	SP	32	D10
D	26.6	SP	52	D10
D	26.6	SP	26	D10
D	28.2	SP	21	D10
D	28.1	SP	34	D10
D	30.1	SP	21	D10
D	29.9	SP	36	D10
E	23	SP	263	E10
E	24.2	SP	130	E10
E	26.1	SP	234	E10
E	29	SP	241	E10
D	22.8	SP	49	D11
D	22.8	SP	26	D11
D	25.5	SP	9	D11
D	25.5	SP	39	D11
D	26.9	SP	16	D11
D	26.9	SP	12	D11
D	28	SP	9	D11
D	27.9	SP	57	D11
D	29.1	SP	11	D11
D	29.1	SP	51	D11
D	30.3	SP	50	D11
D	30.2	SP	154	D11
E	24.5	SP	281	E13
E	24.4	SP	136	E13
E	25.7	SP	118	E13
E	26.2	SP	110	E13
E	27	SP	199	E13
E	27.2	SP	142	E13
E	28	SP	172	E13
E	29.1	SP	156	E13
E	30.3	SP	81	E13
E	30.2	SP	76	E13
D	23.7	SP	65	D12
D	23.1	SP	70	D12
D	25.2	SP	12	D12
D	25.2	SP	20	D12
D	27.3	SP	34	D12
D	27.2	SP	16	D12
D	29.2	SP	15	D12
D	29.2	SP	38	D12
D	30.2	SP	10	D12
D	30.1	SP	10	D12
D	22.6	SP	12	D13
D	22.5	SP	79	D13
D	22.5	SP	12	D13
D	23.8	SP	49	D13
D	23.8	SP	6	D13
D	24.3	SP	16	D13
D	24.3	SP	21	D13
D	25.5	SP	37	D13
D	25.5	SP	10	D13
D	26.3	SP	11	D13
D	27.5	SP	20	D13
D	27.4	SP	11	D13
D	27.4	SP	60	D13
D	28.2	SP	12	D13
D	29.5	SP	5	D13
D	29.5	SP	12	D13
D	30.7	SP	9	D13
D	30.5	SP	13	D13
D	23.8	SU	10	DS1
D	23.8	SU	9	DS1
D	24.6	SU	8	DS1
D	24.6	SU	14	DS1
D	25.4	SU	23	DS1
D	25.4	SU	28	DS1
D	26.4	SU	18	DS1
D	26.4	SU	16	DS1
D	27.1	SU	19	DS1
D	27.1	SU	13	DS1
D	27.7	SU	25	DS1
D	28.2	SU	12	DS1
D	28.8	SU	6	DS1
D	29.8	SU	14	DS1
D	30.6	SU	16	DS1
E	23.8	SU	96	ES1
E	23.8	SU	236	ES1
E	26.2	SU	166	ES1
E	27.5	SU	90	ES1
E	27.5	SU	78	ES1
E	28.9	SU	75	ES1
E	29.4	SU	145	ES1
E	29.4	SU	82	ES1
E	30	SU	108	ES1
E	23.8	SU	57	ES2
E	23.8	SU	50	ES2
E	26.2	SU	41	ES2
E	27.5	SU	42	ES2
E	26.2	SU	47	ES2
E	27.5	SU	78	ES2
E	28.9	SU	126	ES2
E	29.4	SU	36	ES2
E	29.4	SU	103	ES2
E	30	SU	304	ES2
D	21.4	SU	47	DS2
D	22.3	SU	58	DS2
D	23.9	SU	66	DS2
D	24.7	SU	50	DS2
D	25.7	SU	49	DS2
D	27.3	SU	148	DS2
D	28.2	SU	178	DS2
D	30.1	SU	19	DS2
D	21.7	SU	41	DS3
D	22.4	SU	102	DS3
D	24.1	SU	82	DS3
D	25.4	SU	40	DS3
D	26.5	SU	34	DS3
D	28.7	SU	25	DS3
D	29.8	SU	32	DS3
D	21.4	SU	14	DS4
D	22.6	SU	98	DS4
D	23.5	SU	26	DS4
D	25.3	SU	16	DS4
D	26.9	SU	9	DS4
D	27.6	SU	9	DS4
D	28.4	SU	48	DS4
D	29.5	SU	14	DS4
D	30.4	SU	10	DS4
E	21.3	SU	166	ES3
E	23.6	SU	102	ES3
E	24.3	SU	63	ES3
E	25.5	SU	96	ES3
E	27.4	SU	108	ES3
E	28.4	SU	148	ES3
E	30.3	SU	106	ES3
E	30.8	SU	131	ES3
D	24.4	SU	12	DS5
D	25.2	SU	12	DS5
D	26.4	SU	33	DS5
D	27.3	SU	64	DS5
D	28.3	SU	23	DS5
D	29.1	SU	38	DS5
D	30	SU	12	DS5
E	23.6	SU	84	ES4
E	25	SU	89	ES4
E	26.3	SU	59	ES4
E	27.9	SU	226	ES4
E	29	SU	139	ES4
E	29.8	SU	42	ES4
E	23.6	SU	96	ES5
E	25	SU	196	ES5
E	26.3	SU	68	ES5
E	27.9	SU	145	ES5
E	29	SU	77	ES5
E	29.8	SU	149	ES5
D	22.2	SU	6	DS5
D	23.3	SU	17	DS5
D	24.4	SU	20	DS5
D	25.6	SU	12	DS5
D	26.3	SU	11	DS5
D	27.2	SU	35	DS5
D	28.4	SU	10	DS5
D	29.1	SU	8	DS5
D	29.8	SU	12	DS5
D	30.4	SU	7	DS5
E	21.6	SU	82	ES6
E	22.8	SU	158	ES6
E	24.4	SU	127	ES6
E	26.2	SU	113	ES6
E	27.6	SU	67	ES6
E	29.1	SU	223	ES6
E	30.1	SU	370	ES6
E	21.6	SU	51	ES7
E	22.8	SU	98	ES7
E	24.4	SU	132	ES7
E	26.2	SU	73	ES7
E	27.6	SU	35	ES7
E	29.1	SU	41	ES7
E	30.1	SU	54	ES7
D	22.1	SU	20	DS7
D	23.2	SU	12	DS7
D	24.1	SU	30	DS7
D	25.3	SU	13	DS7
D	26.6	SU	14	DS7
D	27.4	SU	14	DS7
D	28.3	SU	13	DS7
D	29.5	SU	26	DS7
D	30.3	SU	16	DS7
D	22.6	SU	11	DS8
D	23.3	SU	22	DS8
D	24.3	SU	49	DS8
D	24.6	SU	24	DS8
D	24.6	SU	24	DS8
D	25.7	SU	24	DS8
D	26.4	SU	15	DS8
D	26.8	SU	15	DS8
D	27.7	SU	23	DS8
D	28.6	SU	13	DS8
D	29.6	SU	7	DS8
D	30.2	SU	8	DS8
D	23.8	SU	12	DS9
D	24.7	SU	25	DS9
D	25.5	SU	31	DS9
D	27.2	SU	23	DS9
D	28.5	SU	25	DS9
D	29.7	SU	43	DS9
D	21.2	W	81	DW1
D	22.1	W	167	DW1
D	24.1	W	41	DW1
D	25.8	W	41	DW1
D	27	W	43	DW1
D	28.2	W	24	DW1
D	29.6	W	40	DW1
D	30.2	W	59	DW1
D	20.7	W	40	DW2
D	21.8	W	43	DW2
D	24.1	W	36	DW2
D	25.7	W	48	DW2
D	27	W	77	DW2
D	27.8	W	9	DW2
D	28.7	W	19	DW2
D	29.4	W	14	DW2
D	30.2	W	8	DW2
D	30.7	W	20	DW2
D	21.3	W	56	DW3
D	22.9	W	79	DW3
D	23.8	W	61	DW3
D	24.9	W	71	DW3
D	26.3	W	61	DW3
D	27.2	W	72	DW3
D	28.2	W	56	DW3
D	28.9	W	73	DW3
D	21.5	W	59	DW4
D	22.5	W	46	DW4
D	23.5	W	105	DW4
D	24.6	W	57	DW4
D	26.8	W	90	DW4
D	27.4	W	90	DW4
D	28.5	W	50	DW4
D	29.2	W	53	DW4
D	30.3	W	30	DW4
D	22.6	W	24	DW5
D	23.5	W	31	DW5
D	24.8	W	49	DW5
D	25.8	W	42	DW5
D	26.6	W	63	DW5
D	27.6	W	49	DW5
D	28.6	W	71	DW5
D	29.8	W	29	DW5
D	30.9	W	40	DW5
D	22.6	W	6	DW6
D	23.3	W	15	DW6
D	25	W	10	DW6
D	25.8	W	27	DW6
D	26.8	W	28	DW6
D	27.4	W	29	DW6
D	28.4	W	28	DW6
D	29.5	W	26	DW6
D	30.9	W	31	DW6
D	22.5	W	36	DW7
D	24	W	42	DW7
D	26.2	W	42	DW7
D	27.6	W	51	DW7
D	29.3	W	60	DW7
D	30.5	W	94	DW7
D	22.9	W	15	DW8
D	23.8	W	8	DW8
D	26.2	W	26	DW8
D	28.4	W	6	DW8
D	29.4	W	8	DW8
D	30.8	W	13	DW8
E	21.8	W	426	EW1
E	26.4	W	442	EW1
E	21.8	W	254	EW2
E	26.4	W	607	EW2
E	28.5	W	214	EW2
E	21.9	W	253	EW3
E	25.6	W	115	EW3
E	27	W	102	EW3
E	28.5	W	67	EW3
E	30	W	96	EW3
E	21.9	W	35	EW4
E	25.6	W	58	EW4
E	27	W	29	EW4
E	28.5	W	30	EW4
E	30	W	30	EW4
E	23.8	W	159	EW5
E	25.3	W	91	EW5
E	29	W	210	EW5
E	23.8	W	42	EW6
E	25.3	W	49	EW6
E	29	W	129	EW6
E	30.1	W	84	EW6
E	25.1	W	104	EW7
E	27	W	87	EW7
E	28.9	W	92	EW7
E	29.5	W	70	EW7
E	25.1	W	71	EW8
E	27	W	47	EW8
E	28.9	W	54	EW8
E	29.5	W	75	EW8
E	30.2	W	118	EW8
